# Supplementary material for: Synthesis of an unprecedented H-stitched binuclear crystal structure based on selective fluorescence recognition of Zn2+ in newly synthesized Schiff base ligand with DFT and imaging application in living cells
Source: Royal Society of Chemistry journal article supplement (doi:10.1039/d1nj03471e), 2021-01-01

## **Supplementary Information**

# **Synthesis of an Unprecedented H-stitched Binuclear Crystal Structure Based on Selective Fluorescence Recognition of Zn<sup>2+</sup> in Newly Synthesized Schiff Base Ligand with DFT and Imaging Application in Living Cells**

Soumya Sundar Mati\*<sup>a</sup>, Saugata Konar<sup>b</sup> and Bobby Samai<sup>c</sup>

<sup>a</sup>Department of Chemistry, Government General Degree College, Keshiary, Paschim Medinipur 721135, India

<sup>b</sup>Department of Chemistry, The Bhawanipur Education Society College, Kolkata 700020, India

<sup>c</sup>Department of Science and Humanities, Hooghly Institute of Technology, Hooghly 712103, India

## **Contents**

1. <sup>1</sup>H NMR of ligand PHP (Figure S1),
2. HRMS of ligand PHP (Figure S2),
3. LOD Plot (Figure S3),
4. Selected bond distances from crystal structure (Table S1).
5. Mechanism of Complex formation (Scheme S1)

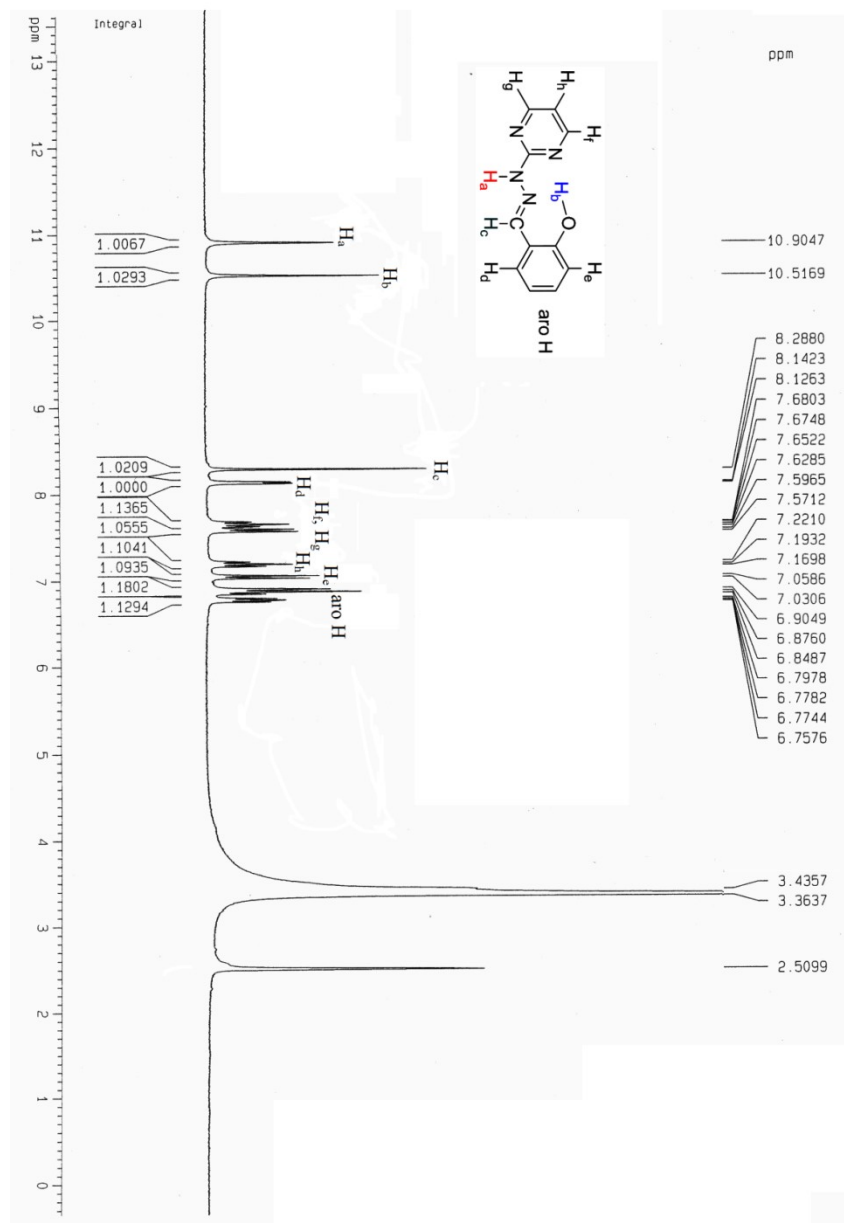

**Figure S1:** <sup>1</sup>H NMR of ligand PHP.

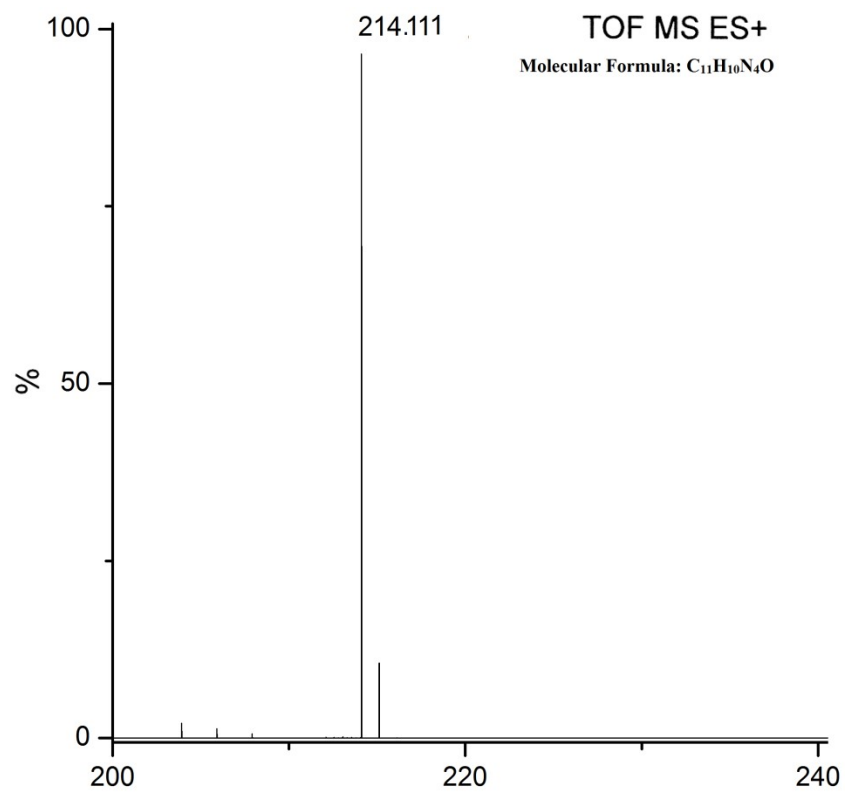

**Figure S2:** . HRMS of ligand PHP.

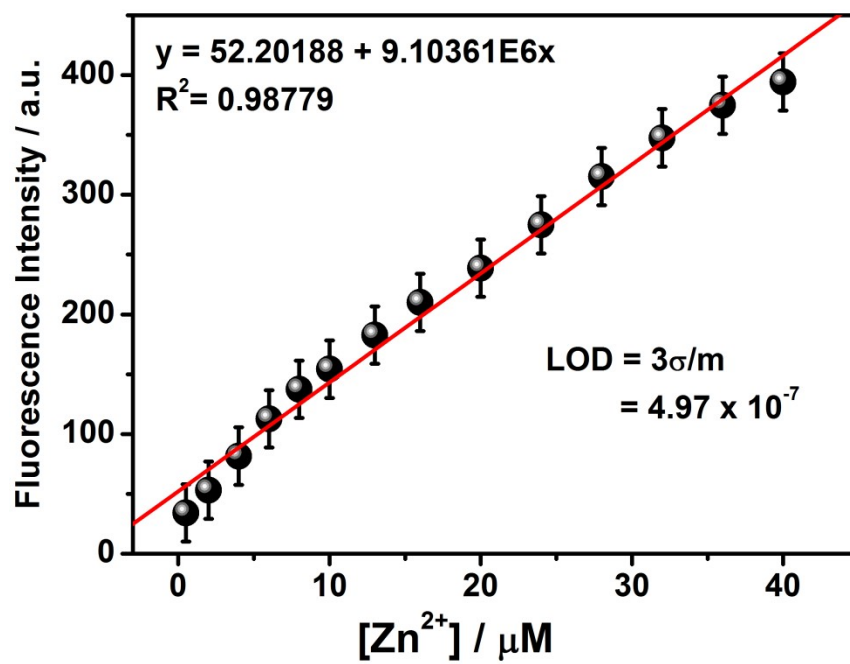

Figure S3: LOD plot for Zn<sup>2+</sup> sensing.

**Table S1.** Selected bond distance (Å) and angle (°) data for **1**

| Selected Bonds | Value(Å) | Selected Angles | (°)        |
|----------------|----------|-----------------|------------|
| Zn01 -O3       | 2.155(2) | O3 -Zn01 -O4    | 85.31(9)   |
| Zn01 -O4       | 2.059(2) | O3 -Zn01 -N9    | 81.19(10)  |
| Zn01 -N9       | 2.149(3) | O3 -Zn01 -N13   | 107.35(10) |
| Zn01 -N11      | 2.142(3) | O4 -Zn01 -N9    | 98.25(10)  |
| Zn01 -N13      | 2.138(3) | O4 -Zn01 -N11   | 97.01(10)  |
| Zn01 -N15      | 2.126(3) | O4 -Zn01 -N13   | 84.00(10)  |
| Zn02 -O1       | 2.162(2) | N9 -Zn01 -N11   | 76.31(11)  |
| Zn02 -O2       | 2.060(2) | N9 -Zn01 -N13   | 171.36(10) |
| Zn02 -N1       | 2.117(3) | N11 -Zn01 -N13  | 95.16(11)  |
| Zn02 -N4       | 2.136(3) | N13 -Zn01 -N15  | 75.91(10)  |
| Zn02 -N5       | 2.127(3) | O1 -Zn02 -O2    | 83.93(9)   |
| Zn02 -N7       | 2.133(3) | N4 -Zn02 -N7    | 99.64(11)  |
| O4 -H202       | 1.34(5)  | N5 -Zn02 -N7    | 76.13(11)  |
| O1 -H202       | 1.16(5)  | O1 -Zn02 -N1    | 81.82(10)  |
|                |          | N1 -Zn02 -N4    | 76.97(11)  |

**Scheme S1: Proposed Mechanism**

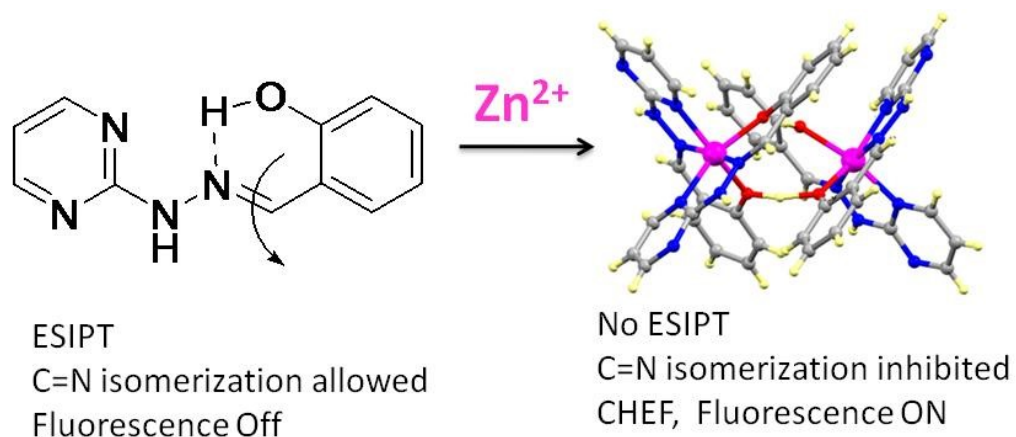

Supplement: d1nj03471e1.pdf [file d1nj03471e1.pdf]
